# Supplementary material for: Amber Extract Reduces Lipid Content in Mature 3T3-L1 Adipocytes by Activating the Lipolysis Pathway
Source: MDPI journal article supplement (doi:10.3390/molecules26154630), 2021-07-30
Supplement: s1 [file s1]

## Supplementary Materials

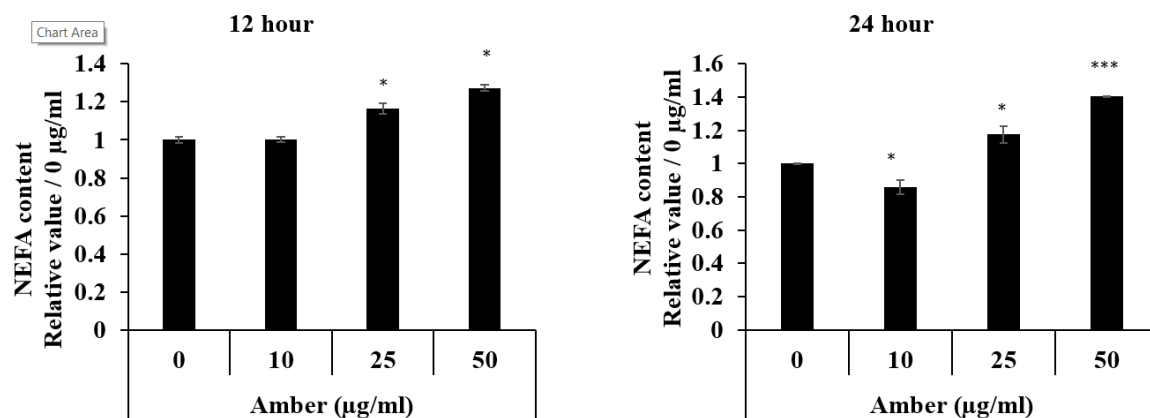

Figure S1 Amber increased the NEFA content in medium after 12- and 24-hour treatment.

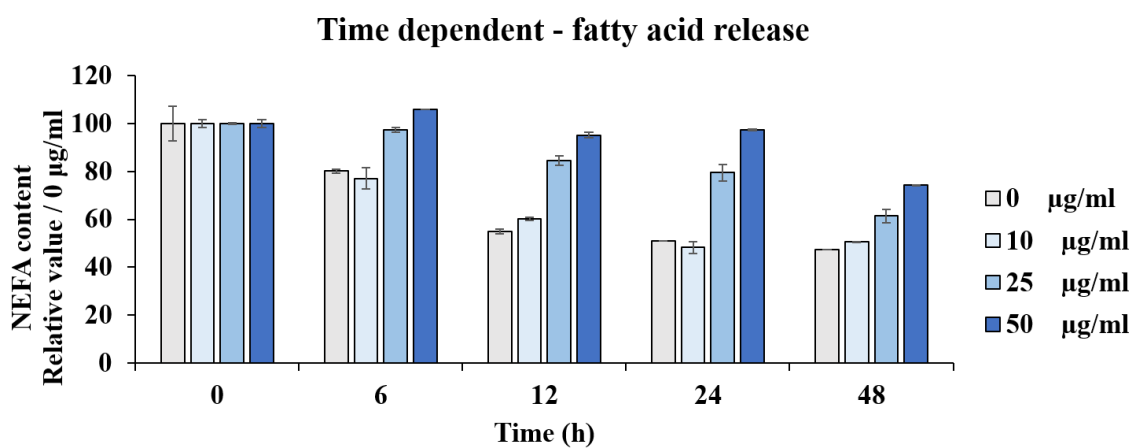

Figure S2 Amber dose-dependently slow down the decrease of NEFA in medium.
